# Supplementary material
Source: PubMed Central journal article supplement (PMC3943352)
Supplement: NIHMS556800-supplement-Bemben_et_al___Suppl_Information.pdf [file NIHMS556800-supplement-Bemben_et_al___Suppl_Information.pdf]

## Supplementary Information to

### CaMKII phosphorylation of neuroligin-1 regulates excitatory synapses

Michael A. Bemben<sup>1,2</sup>, Seth L. Shipman<sup>3</sup>, Takaaki Hirai<sup>2</sup>, Bruce E. Herring<sup>3</sup>, Yan Li<sup>4</sup>,  
John D. Badger II<sup>2</sup>, Roger A. Nicoll<sup>3</sup>, Jeffrey S. Diamond<sup>5</sup>, and Katherine W. Roche<sup>2\*</sup>

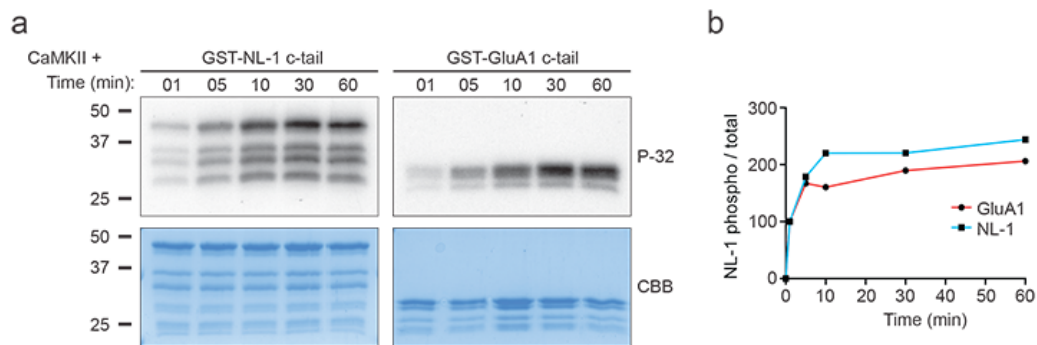

**Supplementary Figure 1:** NL-1 and GluA1 c-tails have similar reaction kinetics. **(a)** GST-NL-1 or GluA1 were incubated with purified CaMKII and [ $\gamma$ -P<sup>32</sup>]ATP and analyzed by autoradiography. Reactions were stopped at their marked time. **(b)** Protein concentrations are plotted as a ratio of phosphorylated NL-1 (P-32) to total NL-1 (CBB) normalized to the 1 min reaction condition. Saturation of phosphorylated NL-1 and GluA1 occurred at approximately 10 min. Total protein was visualized by CBB protein staining, in **a,b**. Full-length blots are presented in Supplementary Figure 4 when applicable.

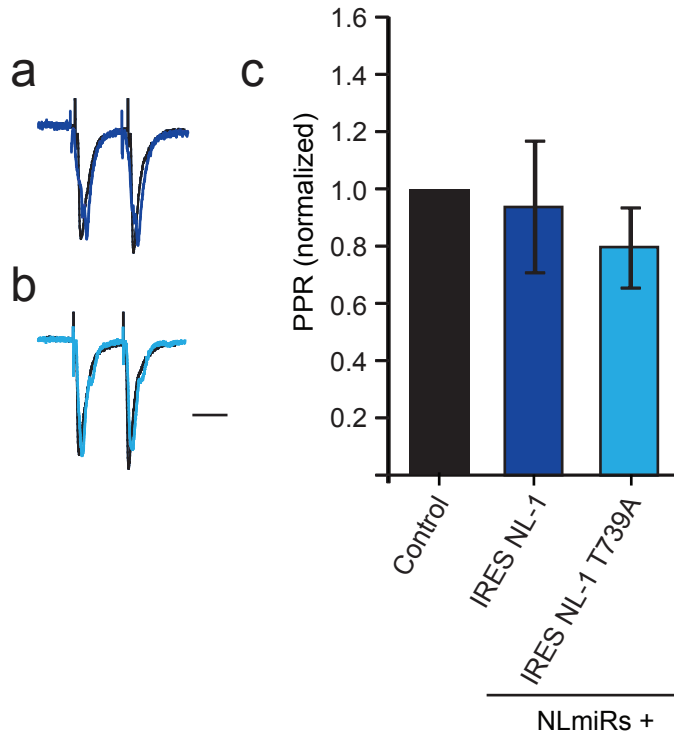

**Supplementary Figure 2:** NL-1 T739A does not affect presynaptic release probability. Paired-pulse ratio (PPR), second EPSC over first EPSC for consecutive stimuli separated by 40 ms. Example traces normalized at first EPSC for (a) NL-1. (b) NL-1 T739A. (c) Second EPSC over first  $\pm$  SEM. NL-1 and NL-1 T739A had similar PPRs ( $P > 0.05$ ,  $n = 5$ ). Scale bars represent 25 ms.

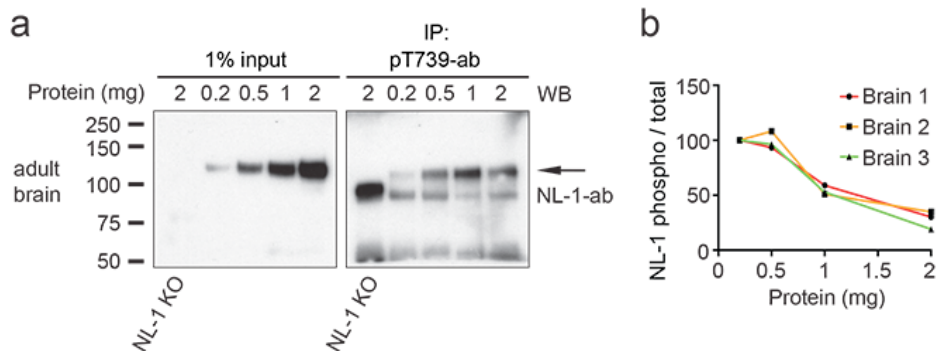

**Supplementary Figure 3:** Titration of phosphorylated NL-1 with pT739-Ab (a) Protein concentrations from adult WT or NL-1 KO brains were titrated with pT739-Ab. (b) Protein concentrations are plotted as ratio of phosphorylated (IP) to total NL-1 (input) normalized to the 0.2 mg protein condition for an individual brain. Saturation of the pT739-Ab occurs between 0.5 and 1 mg of protein.

Figure 1.

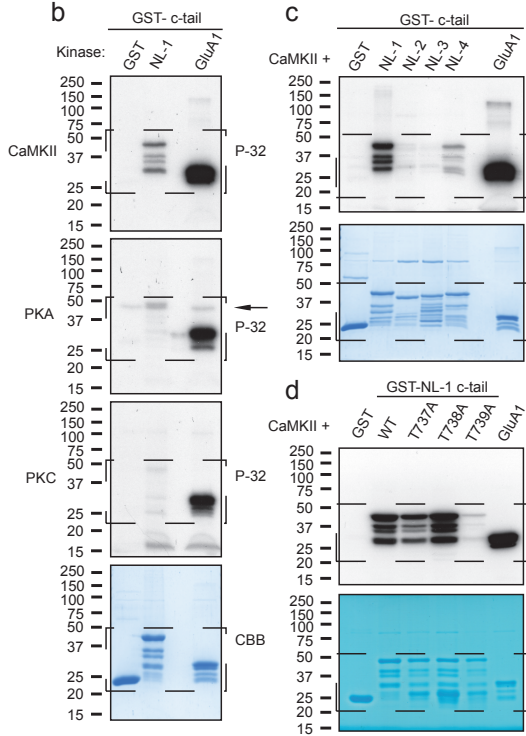

Figure 2.

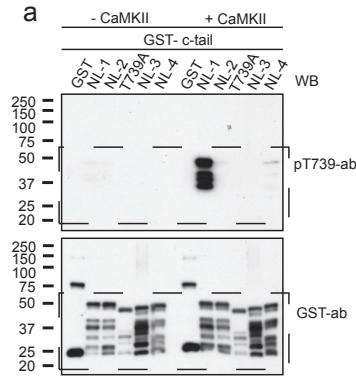

Figure 3.

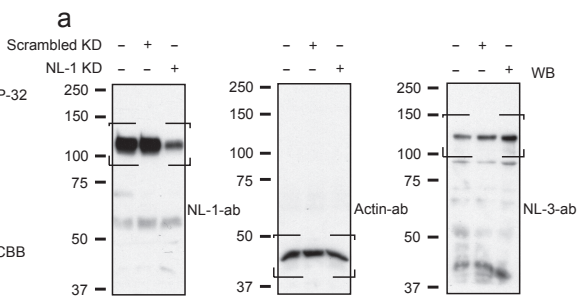

Figure 3.

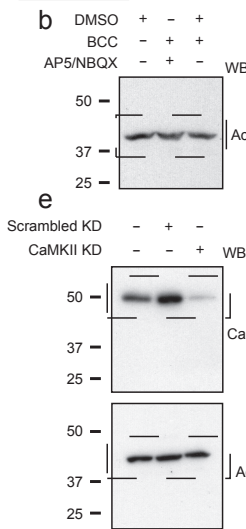

Figure 7.

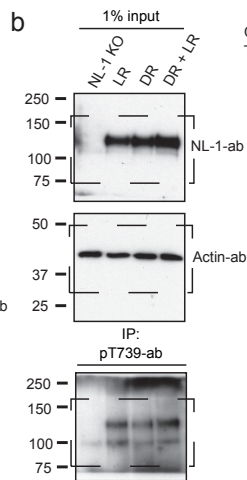

Supplementary Figure 1.

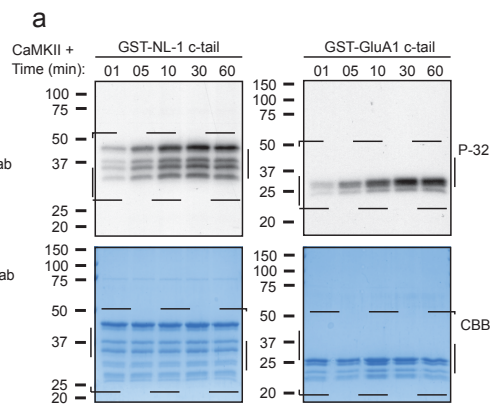

Supplementary Figure 4: Full-length blots of cropped blots from the manuscript.
